# Supplementary material
Source: publisher figshare collection journal article supplement (https://tandf.figshare.com/articles/dataset/_/7409234)
Supplement: Supplementary file 1 [file 2]

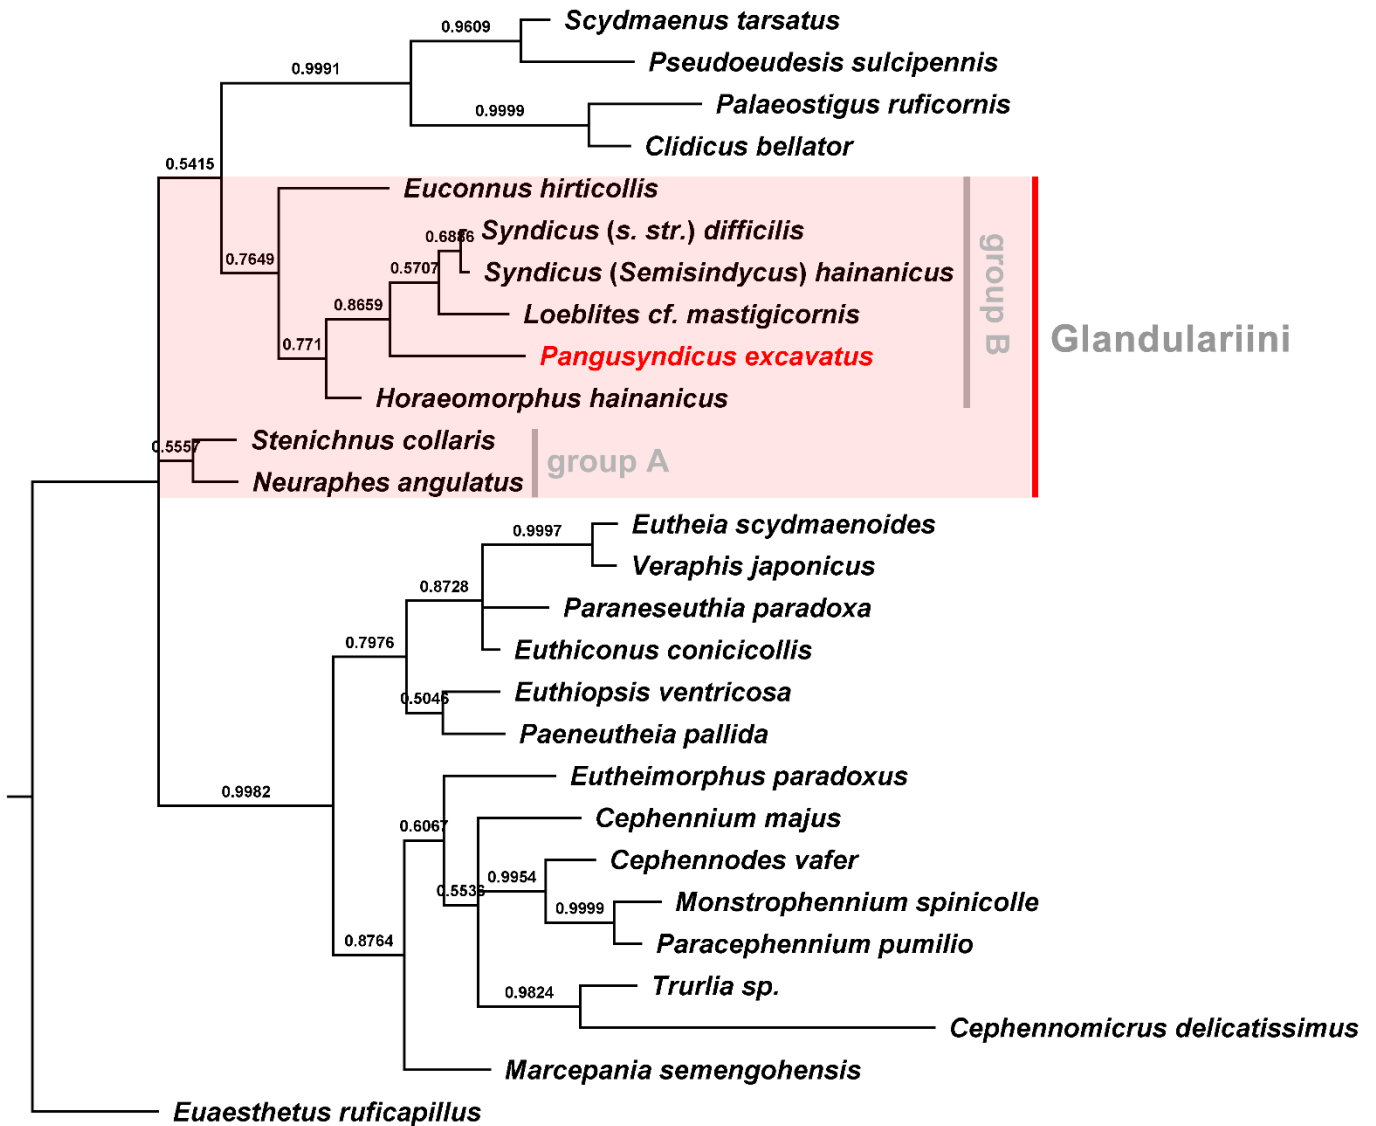

**Supplementary Figure 3.** Majority-rule consensus tree of Bayesian inference showing phylogenetic placement of *Pangusyndicus excavatus* gen. et sp. nov. Values on branches are posterior probabilities (PP).
