# Supplementary material
Source: publisher figshare collection journal article supplement (https://tandf.figshare.com/articles/dataset/_/7409234)
Supplement: Supplementary file 2 [file 2]

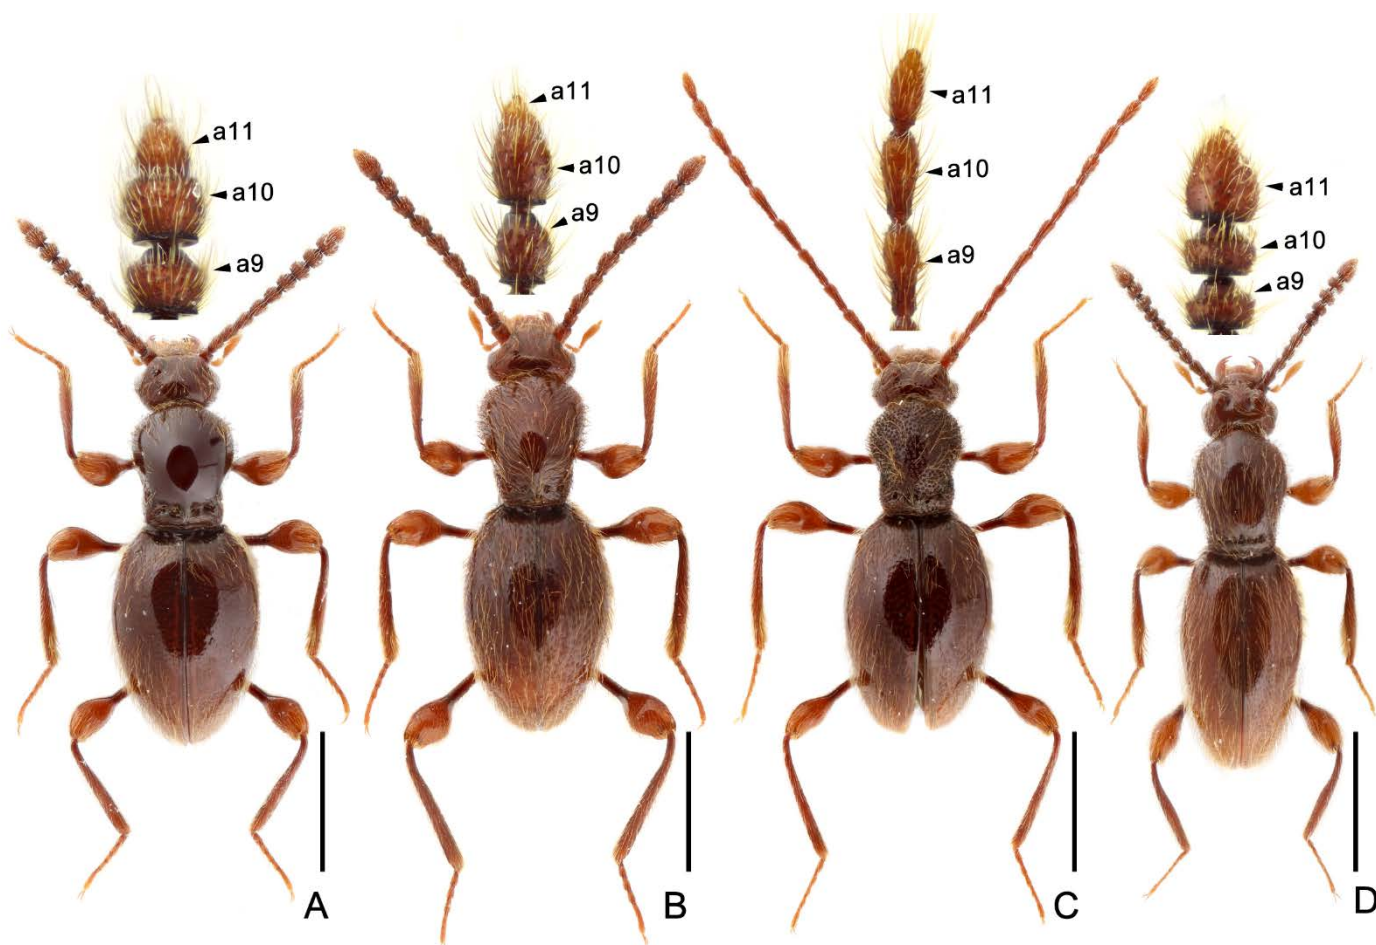

**Supplementary Figure 1.** Comparative morphology of Recent Glandulariini, showing habitus and apical antennomeres. A, *Syndicus (Semisyndicus) hainanicus*, female; B, *Syndicus (s. str.) himalayanus*, male; C, *Loeblites cf. mastigicornis*, female; D, *Horaeomorphus hainanicus*, female. Abbreviations: a9–11 = antennomeres IX–XI. Scale bars: 1.0 mm.
