# Supplementary material
Source: publisher figshare collection journal article supplement (https://tandf.figshare.com/articles/dataset/_/7409234)
Supplement: Supplementary file 3 [file 2]

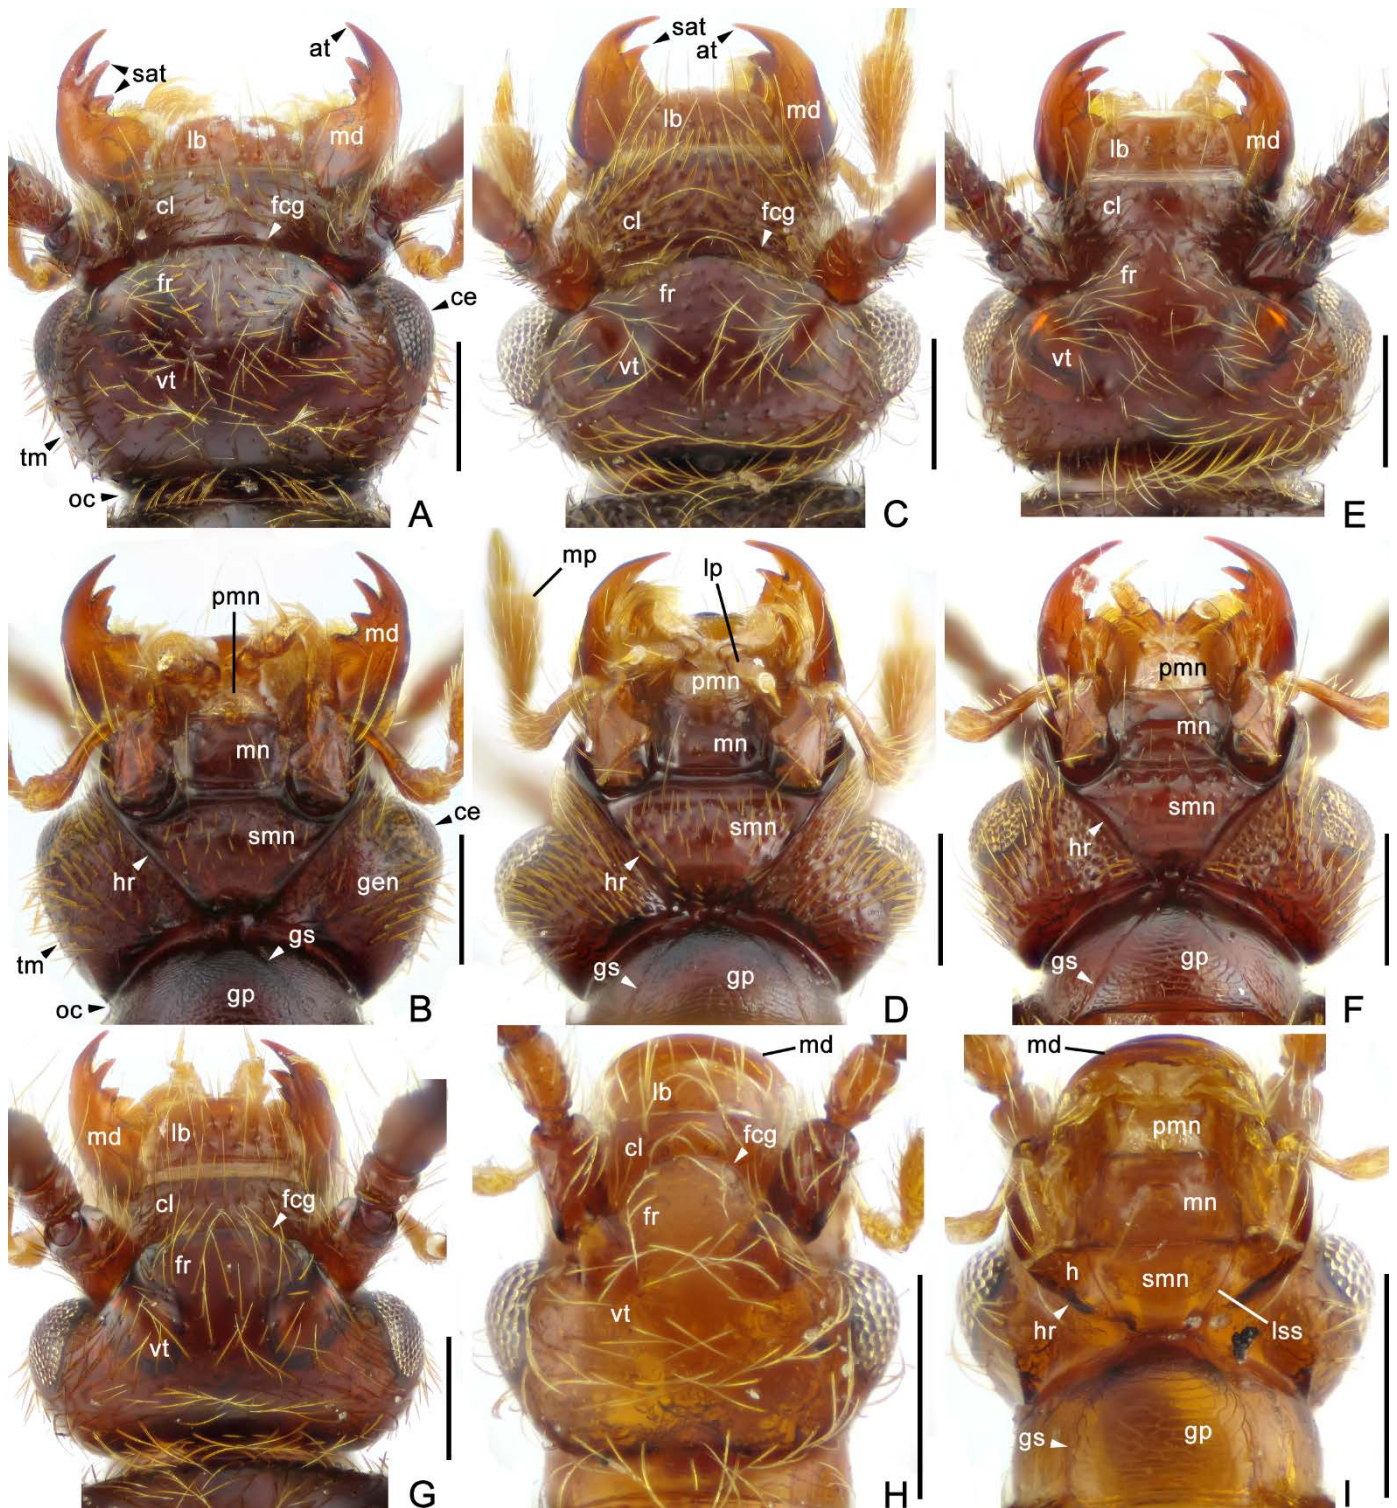

**Supplementary Figure 2.** Comparative morphology of Recent Glandulariini, head in dorsal (A, C, E, G, H) and ventral (B, D, F, I) views. **A, B**, *Syndicus (Semisyndicus) sinensis*, male; **C, D**, *Loeblites cf. mastigicornis*, female; **E, F**, *Horaeomorphus hainanicus*, female; **G**, *Syndicus (s. str.) himalayanus*, male; **H, I**, *Stenichnus (s. str.) zhejiangensis*, male. Abbreviations: at = apical tooth, ce = compound eye, cl = clypeus, fcg = frontal-clypeal groove; fr = frons, gen = gena, gp = gular plate, gs = gular suture, h = hypostoma, hr = hypostomal ridge; lb = labrum, lss = lateral submental suture, md = mandible, mn = mentum; mp = maxillary palpus; pmn = prementum; oc = ocular constriction, tm = temple, sat = subapical tooth, smn = submentum; tm = temple, vt = vertex. Scale bars: 0.2 mm.
